# Supplementary material for: Malignant Transformation of Postmenopausal Endometriosis: A Systematic Review of the Literature
Source: MDPI journal article supplement (doi:10.3390/cancers13164026), 2021-08-10
Supplement: s1 [file s1]

Supplementary Table 1. Detailed data synthesis of included studies.

| Authors (Year)                            | Age    | HRT use        | Personal history                                                           | Past endometriosis/adenomyosis | Past surgery                                  | Surgery indication: endometriosis | Signs/Symptoms                                                                                         | Surgical treatment                                                                                                                  | Medical treatment                                                         | Locations                                                        | Histology                           | Follow-up (months) |
|-------------------------------------------|--------|----------------|----------------------------------------------------------------------------|--------------------------------|-----------------------------------------------|-----------------------------------|--------------------------------------------------------------------------------------------------------|-------------------------------------------------------------------------------------------------------------------------------------|---------------------------------------------------------------------------|------------------------------------------------------------------|-------------------------------------|--------------------|
| Carbone F. et al. <sup>10</sup> (2020)    | 53     | No             | G0                                                                         | Endometriosis                  | TAH and BSO                                   | Yes                               | Abdominal pain                                                                                         | Debulking surgery                                                                                                                   | No                                                                        | Left pelvic side wall                                            | Low-grade sarcoma                   | 4, alive           |
| Chih-Hsuan S. et al. <sup>11</sup> (2020) | 60     | U              | G0                                                                         | No                             | None                                          | No                                | Abdominal pain, weight loss. A bulky mass palpable at lower abdomen                                    | Debulking surgery                                                                                                                   | CHT (taxane/ platinum)                                                    | Adnexa                                                           | Right ovary: EAC<br>Left ovary: CCC | U                  |
| Cope AG. et al. <sup>12</sup> (2020)      | 55     | U              | None relevant                                                              | Endometriosis, adenomyosis     | Hysterectomy                                  | Yes                               | Dyspareunia and AVB, pelvic cramping, and urinary urgency. Firm, fixed mass in the right upper vagina. | Surgery                                                                                                                             | No                                                                        | Vaginal apex, right ovary, rectum                                | EAC                                 | U                  |
|                                           | 54     | No             | None relevant                                                              | No                             | Hysterectomy; pelvic resection.               | No                                | Pelvic pain and left ureteral obstruction                                                              | Pelvic mass surgical resection                                                                                                      | CHT                                                                       | Left pelvic sidewall, sigmoid colon, left ureter                 | EAC and CCC                         | 120, recurrence    |
| Uehara T. et al. <sup>13</sup> (2019)     | 49     | No             | Infertility treatment                                                      | No                             | None                                          | No                                | AVB. Hard mass in the left cervix and parametrium                                                      | RAH, BSO and pelvic LNT                                                                                                             | CHT                                                                       | Cervical stroma, left parametrium                                | EAC                                 | 12, alive          |
| Chang C. et al. <sup>14</sup> (2017)      | 56     | U              | G3 P3. Obesity, diabetes mellitus, hypercholesterolemia, and hypertension. | No                             | None                                          | No                                | AVB and pelvic pain                                                                                    | TLH, BSO, omental and peritoneal biopsy                                                                                             | RT                                                                        | Uterus, paratubal                                                | EAC                                 | U                  |
| Tashima L. et al. <sup>15</sup> (2017)    | 51     | U              | 3G 3P                                                                      | No                             | None                                          | No                                | AVB, slight anemia                                                                                     | TAH and BSO                                                                                                                         | CHT                                                                       | Uterus, ovary                                                    | EAC                                 | 12 alive           |
| Roncati L. et al. <sup>16</sup> (2016)    | 64, 62 | U              | None relevant                                                              | No                             | None                                          | No                                | AVB                                                                                                    | TAH, BSO and loco-regional lymphadenectomy                                                                                          | No                                                                        | Endometrium, ovaries                                             | G2 EAC                              | U                  |
| Pontrelli G. et al. <sup>17</sup> (2016)  | 58     | EP for 5 y     | Fibromatosis                                                               | Endometriosis                  | AH and BSO                                    | No                                | Severe and recurrent endometriosis                                                                     | LPS with total colectomy, parametrectomy and partial cystectomy                                                                     | No                                                                        | Vagina, left parametrium                                         | Primary vaginal adenosarcoma        | U                  |
| Andriola V. et al. <sup>18</sup> (2016)   | 54     | No             | G3 P0; BMI 29; fibromatosis                                                | No                             | Cesarean section; TAH and BSO                 | No                                | Pelvic and anal pain, constipation, oliguria                                                           | Low rectal resection                                                                                                                | No                                                                        | Pelvis (between rectum and sacrum)                               | Well differentiated EAC             | U                  |
| Lu B. et al. <sup>19</sup> (2016)         | 64     | No             | G2 P2. Diabete mellitus type II                                            | No                             | None                                          | No                                | Left low abdominal pain                                                                                | TAH and BSO, omentectomy, pelvic LNT                                                                                                | CHT (taxol/ carboplatin)                                                  | Uterus, left adnexus                                             | Adenocarcinoma serous carcinoma     | 1, alive           |
|                                           | 55     | U              | G1. Multiple leiomyomas. Diabete mellitus type II, hyperthesion, asmha     | Adenomyosis                    | Cesarean section                              | No                                | AVB                                                                                                    | TAH, BSO, omentectomy and pelvic lymphadenectomy                                                                                    | CHT (taxol/ carboplatin)                                                  | Uterus                                                           | Endometrial serous carcinoma        | U, alive           |
|                                           | 55     | U              | G2 P1                                                                      | Adenomyosis                    | Cesaren section, STH                          | Yes                               | AVB                                                                                                    | Radical resection of cervical stump, BSO, partial resection of rectum                                                               | No                                                                        | Cervical stump                                                   | Endometrial serous carcinoma        | 44 alive           |
| Mohling S.I. <sup>20</sup> et al. (2016)  | 61     | E+T for 8-10 y | Hypothyroidism                                                             | Endometriosis                  | TAH and BSO                                   | Yes                               | Left lower quadrant mass and pain, dyspareunia, hematuria                                              | LPT with en bloc resection of the tumor                                                                                             | CHT (carboplatin/paclitaxel)                                              | Pelvis, rectosigmoid colon                                       | EAC                                 | U alive            |
| Ijichi S. et al. <sup>21</sup> (2014)     | 60     | U              | G3 P0                                                                      | No                             | 2 cesarian sections                           | No                                | Growing mass                                                                                           | Radical resection of the abdominal wall mass                                                                                        | No                                                                        | Abdominal wall (cesarean scar)                                   | CCC                                 | 8+15, recurrence   |
| Yu X.J. et al. <sup>22</sup> (2014)       | 55     | No             | Dismenorrhea, fibromatosis                                                 | No                             | None                                          | No                                | Right abdomen lower pain; weakness of limbs                                                            | TAH, BSO, omentectomy, right infundibulopelvic ligament resection                                                                   | CHT (bleomicina/ etoposide/ cisplatin)                                    | Right ovary                                                      | Mixed germ cell tumor and CCC       | U, alive           |
| Taga S. et al. <sup>23</sup> (2014)       | 57     | U              |                                                                            | No                             | None                                          | No                                | AVB                                                                                                    | TAH; BSO; pelvic limphadenectomy                                                                                                    | CHT                                                                       | Uterus                                                           | EAC                                 | 60, recurrence     |
| Lah K. et al. <sup>24</sup> (2013)        | 59     | U              | Hypercholesterolemia                                                       | No                             | 2 cesarean sections and tubal ligation        | No                                | 7-year history of intermittent hematuria                                                               | Robotic-assisted anterior pelvic exenteration and pelvic LNT                                                                        | Neoadjuvant CHT (cisplatin/ gemcitabine)<br>CHT (carboplatin/ paclitaxel) | Bladder                                                          | CCC                                 | 12, alive          |
| Hansen K. et al. <sup>25</sup> (2012)     | 81     | U              | Menopause at 50                                                            | No                             | None                                          | No                                | AVB, abdominal fullness                                                                                | TAH, BSO, omentectomy, pelvic and paraortic LNT                                                                                     | No                                                                        | Right ovary, uterus                                              | EAC                                 | 35, alive          |
| Shalin S. et al. <sup>26</sup> (2012)     | 47     | U              | 4G 4P                                                                      | No                             | Previous caesarian section                    | No                                | Pelvic pain, tender subcutaneous nodule on abdomen with daily menstrual-like cramping                  | Wide resection of the abdominal wall mass, inguinal and iliac LNT                                                                   | CHT; RT                                                                   | Abdominal wall (near cesarean scar)                              | CCC                                 | 5+2, recurrence    |
| Mann S. et al. <sup>27</sup> (2012)       | 54     | No             | None relevant                                                              | No                             | None                                          | No                                | Gross hematuria, irregular menses                                                                      | Transurethral resection of the mass; TAH, BSO, partial cystectomy, pelvic lymph node dissection and anterior vaginal wall resection | No                                                                        | Bladder invading rectum                                          | CCC                                 | U                  |
| Coyne J.D. et al. <sup>28</sup> (2012)    | 50     | U              | Angiomixoma treated with surgery                                           | No                             | LPT with asportation of abdominal angiomixoma | No                                | Abdominal fullness; constipation                                                                       | TAH and BSO, asportation of abdominal mass, washing                                                                                 | No                                                                        | Abdominal wall, retroperitoneum, pelvis, uterus and upper vagina | Angiomixoma                         | U                  |
| Takahashi Y. et al. <sup>29</sup> (2011)  | 54     | No             | U                                                                          | No                             | None                                          | No                                | Abdominal distension                                                                                   | TAH, BSO, total omentectomy, appendoectomy, pelvic and para aortic LNT                                                              | CHT (paclitaxel/ carboplatin; doxorubicina/paclitaxel)                    | Ovary; liver; paraortic lymphnodes                               | CCC with hepatoid carcinoma foci    | 48, alive          |

|                                                |    |                         |                                                               |                                                           |                                                                                                   |     |                                                                                         |                                                                                                              |                                                            |                             |                                                  |               |
|------------------------------------------------|----|-------------------------|---------------------------------------------------------------|-----------------------------------------------------------|---------------------------------------------------------------------------------------------------|-----|-----------------------------------------------------------------------------------------|--------------------------------------------------------------------------------------------------------------|------------------------------------------------------------|-----------------------------|--------------------------------------------------|---------------|
| Healy K.A. et al. <sup>30</sup> (2010)         | 51 | E since 38 y            | End-stage renal disease for glomerular nephritis, menorrhagia | No                                                        | TAH and BSO. Left-renal transplant                                                                | No  | Hematuria, hydrourteronephrosis                                                         | LPT with left nephro-ureterectomy, pelvic LNT, proctectomy                                                   | CHT (carboplatin/ taxol)                                   | Native left mid-ureter      | EAC (grade II-III)                               | U, alive      |
| Nomoto K. et al. <sup>31</sup> (2010)          | 57 | No                      | G1 P1. BMI 32, fibromatosis                                   | Pelvic endometriosis                                      | Hysterectomy and adesioliis in pouch douglas                                                      | No  | AVB                                                                                     | Total abdominal vaginectomy, pelvic LNT, left salpingo-oophorectomy                                          | No                                                         | Vagina                      | EAC                                              | 12, alive     |
| Hirabayashi K. et al. <sup>32</sup> (2009)     | 73 | No                      | G3 P3                                                         | Adenomyosis                                               | None                                                                                              | No  | Slight fever, weight loss                                                               | TAH and BSO                                                                                                  | CHT                                                        | Uterus                      | CCC                                              | 7, recurrence |
| Efthymiou C.A. et al. <sup>33</sup> (2009)     | 59 | E+T for 13 y            | None relevant                                                 | Severe ovarian and pelvic endometriosis                   | Umbilicus excision of endometriotic deposit. TAH and BSO                                          | Yes | Constipation, tenesmus and 7 kg weight loss                                             | Anterior rectum resection with covering loop ileostomy                                                       | No                                                         | Rectum                      | EAC                                              | U, alive      |
| Karanjgaokar V.C. et al. <sup>34</sup> (2009)  | 60 | E for 14 y              | P2                                                            | Ovarian endometriosis and adenomyosis                     | TAH and BSO                                                                                       | Yes | Intermittent right sided abdominal pain                                                 | Right hemicolectomy with excision of the retroperitoneal cyst                                                | aromatase inhibitor, CHT                                   | Retroperitoneal             | Adenosarcoma and endometrioid adenocarcinoma     | U             |
|                                                | 56 | E+T for 12 y            | G0                                                            | Endometriosis in the ovary, uterine serosa and bowel      | Laparohysterectomy and left salpingo oophorectomy; right salpingo oophorectomy with appendicotomy | Yes | Recent onset of discomfort in her right iliac fossa                                     | Debulking surgery                                                                                            | CHT (carboplatin)                                          | Pelvis                      | EAC                                              | U             |
|                                                | 55 | E+T for 9 y             | P2                                                            | Endometriosis and left ovarian endometrioma               | STH and BSO                                                                                       | Yes | Cramp like discomfort in the abdomen ant thighs and postmenopausal bleeding             | Excision of the tumor mass including removal of the cervix and rectosigmoid en bloc with right hemicolectomy | CHT (ifosfamide, doxorubicin)                              | Pelvis                      | High grade endometrial stromal sarcoma           | U             |
| Motohara K. et al. <sup>35</sup> (2008)        | 52 | No                      | Hypermenorrhea, dysmenorrhea, fibromatosis                    | Adenomyosis                                               | No                                                                                                | No  | AVB                                                                                     | TAH, pelvic LNT                                                                                              | CHT                                                        | Uterus                      | EAC                                              | 60, alive     |
| Al-Talib A. et al. <sup>36</sup> (2008)        | 68 | E                       | Fibromatosis                                                  | Endometriosis                                             | TAH and BSO                                                                                       | Yes | Left-sided pelvic mass and shortness of breath                                          | None                                                                                                         | CHT (carboplatin/ paclitaxel)                              | Pelvis                      | Metastatic EAC                                   | 24, alive     |
| Noel J.C. et al. <sup>37</sup> (2006)          | 75 | Soy isoflavones for 5 y | None relevant                                                 | Extensive endometriosis and adenomyosis                   | TH and BSO                                                                                        | Yes | Chronic abdominal pain, left pyelonephritis                                             | Small bowel and partial bladder resection, left nephroureterectomy                                           | Letrozole                                                  | Right ureter                | Mullerian carcinosarcoma (mixed mullerian tumor) | 3, alive      |
| Nomura S. et al. <sup>38</sup> (2006)          | 40 | EP + CEE for 22 months  | G0.                                                           | Endometriosis, adenomyosis                                | TAH and BSO                                                                                       | Yes | Solid mass involving the vaginal cuff                                                   | None                                                                                                         | CHT (carboplatin/ paclitaxel – irinotecan/ carboplatin; RT | Vaginal cuff                | EAC                                              | 16; deceased  |
| Shah C. et al. <sup>39</sup> (2006)            | 55 | No                      | U                                                             | No                                                        | No                                                                                                | No  | AVB, polypoid vaginal lesion                                                            | TAH, BSO, upper vaginectomy, pelvic and peri-aortic LNT                                                      | No                                                         | Vagina                      | CCC                                              | 7, alive      |
| Hirabayashi K. et al. <sup>40</sup> (2006)     | 50 | No                      | G0                                                            | Ovarian endometrioma                                      | Left salpingo oophorectomy                                                                        | Yes | Abdominal pain and distention, abdominal tenderness, palpable pelvic mass               | TAH, right salpingo oophorectomy, LNT                                                                        | CHT                                                        | Ovary                       | EAC, small cells carcinoma, choriocarcinoma, CCC | 10, deceased  |
| Milam M.R. et al. <sup>41</sup> (2006)         | 47 | E for 16 y              | None relevant                                                 | Left and right endometriomas                              | Surgical menopause                                                                                | Yes | Persistent and enlarging right groin mass, right lower quadrant tenderness              | Surgical en bloc excision                                                                                    | No                                                         | Inguinal                    | Adenosarcoma                                     | 12, alive     |
| Taylor A. et al. <sup>42</sup> (2005)          | 55 | U                       | Fibromatosis                                                  | Ovarian endometriosis                                     | TAH and BSO; excision of a vault endometrioma                                                     | Yes | ABV and dyschezia                                                                       | LPT: inoperable frozen pelvis                                                                                | No                                                         | Pelvi, vagina               | EAC                                              | U             |
|                                                | 54 | No                      | None relevant                                                 | Ovarian endometriosis                                     | LPT excision of ovarian endometrioma                                                              | Yes | Pain and an abdominal mass                                                              | TAH, BSO, omentectomy                                                                                        | No                                                         | Ovary and uterine fundus    | Moderately differentiated EAC                    | U             |
| Chang H.Y. et al. <sup>43</sup> (2005)         | 37 | CEE for 11 y            | G0 P0                                                         | Extensive endometriosis (ovarian)                         | TAH and BSO                                                                                       | Yes | Vaginal bleeding                                                                        | Cytoreductive surgery                                                                                        | No                                                         | Cul de sac, peritoneum      | Adenosarcoma                                     | U             |
| Somoye G.O. et al. <sup>44</sup> (2005)        | 68 | E for 20 y              | Thyrototoxicosis.                                             | Endometriosis.                                            | TAH and BSO                                                                                       | Yes | Pelvic discomfort and hematuria                                                         | None                                                                                                         | RT                                                         | Vagina and bladder          | Adenocarcinoma                                   | U             |
| Kawate S. et al. <sup>45</sup> (2005)          | 62 | CEE for 14 y            | Fibromatosis                                                  | Deeply infiltrating endometriosis                         | TAH and BSO                                                                                       | Yes | Abdominal mass                                                                          | Sigmoidectomy with LNT                                                                                       | CHT                                                        | Sigmoid colon               | EAC                                              | 28, alive     |
| Salerno M.G. et al. <sup>46</sup> (2005)       | 54 | Estradiol for 5 y       | Fibromatosis, bilateral serous ovarian cysts                  | No                                                        | TAH and BSO                                                                                       | No  | Pelvic pain, recurrent cystitis                                                         | Mass partially removed, lomboarctic and pelvic LNT                                                           | CHT                                                        | Right ureter                | EAC with squamous differentiation                | 12, alive     |
| Jelovsek J.E. et al. <sup>47</sup> (2004)      | 52 | GnRh analogues          | G1 P1                                                         | Endometriosis.                                            | TAH and BSO                                                                                       | No  | Flulike symptoms, right-sided shoulder pain, and pain with inspiration                  | Resection of the suspected liver endometrioma and pelvic LPT with peritoneal biopsies                        | No                                                         | Liver                       | Mullerian adenocarcinoma                         | U, alive      |
| Lacroix – Triki M. et al. <sup>48</sup> (2004) | 45 | GnRh analogues          | None relevant                                                 | Aggressive neurological endometriosis                     | None                                                                                              | No  | Disabling sciatica with motor deficit                                                   | TAH, BSO, excision of pelvic endometriotic pockets                                                           | CHT, GnRh-a, palliative RT                                 | Left pelvis (sciatic nerve) | Low grade endometrial stromal sarcoma            | Deceased      |
| Soliman N.F. et al. <sup>49</sup> (2004)       | 60 | CEE for 3 y             | Microinvasive squamous carcinoma of the cervix                | Pelvic endometriosis                                      | TAH and BSO                                                                                       | No  | Heavy, painless vagin bleeding, palpable fixed mass, polypoid necrotic lesion           | LPT with partial mass excision                                                                               | RT                                                         | Pelvis                      | Moderately differentiated EAC                    | U, alive      |
|                                                | 51 | E+T for 10 y            | None relevant                                                 | Extensive endometriosis, endometriotic right ovarian cyst | TAH and right salpingo oophorectomy                                                               | Yes | Painless mass in the right side of the abdomen and several episodes of vaginal bleeding | Excision of the mass, vaginal vault, right nephro-ureterectomy and left salpingo-oophorectomy                | No                                                         | Pelvis                      | EAC                                              | U, alive      |

|                                              |    |                       |                                                                                      |                                                                 |                                                                           |     |                                                                                                                          |                                                                                                                                                                   |                                                                     |                                       |                                                      |             |
|----------------------------------------------|----|-----------------------|--------------------------------------------------------------------------------------|-----------------------------------------------------------------|---------------------------------------------------------------------------|-----|--------------------------------------------------------------------------------------------------------------------------|-------------------------------------------------------------------------------------------------------------------------------------------------------------------|---------------------------------------------------------------------|---------------------------------------|------------------------------------------------------|-------------|
| Garvan F. et al. <sup>50</sup> (2004)        | 53 | No                    | None relevant                                                                        | No                                                              | other                                                                     | No  | Intermittent painful gross haematuria                                                                                    | Hysterectomy with resection of the posterior wall of the bladder                                                                                                  | No                                                                  | Bladder                               | EAC                                                  | U           |
| Areia A. et al. <sup>51</sup> (2004)         | 53 | E for 6 months        | Fibromatosis                                                                         | Endometriotic foci especially in Fallopian tubes                | TAH and BSO                                                               | No  | AVB                                                                                                                      | Debulking surgery                                                                                                                                                 | CHT                                                                 | Vaginal vault, bladder, rectosigmoid  | EAC                                                  | 6, alive    |
| Bese T. et al. <sup>52</sup> (2003)          | 74 | No                    | G3 P1. Hyperthyroidism, hypertension. BMI 29.7. Breast cancer. Tamoxifen for 2 years | No                                                              | STH and BSO. Modified high radical mastectomy                             | No  | AVB                                                                                                                      | Resection of cervix, rectum, and the accompanying mass                                                                                                            | RT                                                                  | Cervix uteri and rectal muscular wall | Adenocarcinoma                                       | 22, alive   |
| Okugawa K. et al. <sup>53</sup> (2002)       | 67 | No                    | G0. Breast carcinoma. Tamoxifen citrate for 4 y                                      | No                                                              | Hysterectomy + BSO                                                        | No  | Genital discharge                                                                                                        | TAH, BSO, pelvic LND dissection, paraaortic lymph node biopsy                                                                                                     | CHT                                                                 | Adnexa                                | EAC                                                  | 48, alive   |
| Petersen V.C. et al. <sup>54</sup> (2002)    | 61 | Estrogen for 5 y      | None relevant                                                                        | Endometriosis                                                   | Surgical menopause                                                        | Yes | Diarrhoea, right buttock pain, rectal mass                                                                               | Anterior resection with formation of a loop ileostomy                                                                                                             | No                                                                  | Large intestine (colorectal)          | Poorly differentiated EAC                            | 28, alive   |
|                                              | 57 | 8 years               | None relevant                                                                        | Ovarian endometriosis                                           | Surgical menopause                                                        | No  | Lower abdominal pain, rectal mass                                                                                        | Anterior resection                                                                                                                                                | No                                                                  | Rectum                                | Variably differentiated EAC                          | 18, alive   |
| Jones K.D. et al. <sup>55</sup> (2002)       | 52 | Esteradiol for 12 y   | G0                                                                                   | Extensive deeply infiltrating rectovaginal endometriosis        | TAH and BSO                                                               | Yes | Rectal bleeding and polyp arising from sigmoid colon                                                                     | Anterior resection of the rectosigmoid colon                                                                                                                      | No                                                                  | Distal sigmoid colon                  | Well differentiated EAC                              | 9, alive    |
| Powell J.L. et al. <sup>56</sup> (2001)      | 56 | EP for 3 y, E for 7 y | Fibromatosis                                                                         | Extensive endometriosis, left ovarian endometrioma, adenomyosis | TAH and BSO                                                               | Yes | lower abdominal pain, dyspareunia, hirsutism, pain with bowel movements                                                  | Surgery                                                                                                                                                           | CHT; progestin therapy                                              | Rectovaginal septum, vault            | EAC                                                  | 9, alive    |
| Lavery S. et al. <sup>57</sup> (2001)        | 50 | E for 13 y            | Urogenital prolapse                                                                  | left endometriotic cyst                                         | Vaginal hysterectomy + BSO                                                | No  | Pain, dyspareunia, urinary frequency. Small low cystocele and a small rectocele                                          | Rsection of the mass, resection of sigmoid colon and a reanastomosis; bladder opening and raise of Boari flap with reanastomosis of ureter over a ureteric stent. | No                                                                  | Vaginal vault                         | Adenocarcinoma                                       | U           |
|                                              | 53 | E for 3 y             | None relevant                                                                        | Ovarian endometriosis, adenomyosis                              | TAH and BSO                                                               | Yes | Abdominal discomfort, swelling, diarrhea, ascites, slightly distended abdomen, firm mass at the vault of the vagina      | LPT and biopses                                                                                                                                                   | No                                                                  | Peritoneal cavity, bowel, vagina      | EAC +CCC                                             | U           |
| Debus G. <sup>58</sup> (2001)                | 50 | E                     | G0                                                                                   | Severe endometriosis                                            | TAH and BSO                                                               | Yes | Pelvic mass                                                                                                              | LPT with excision of the pelvic mass and rectosigmoid colon, pelvic and paraaortic LNT                                                                            | CHT                                                                 | Pelvic mass                           | EAC                                                  | U, alive    |
| Magtibay P.M. et al. <sup>59</sup> (2001)    | 76 | U                     | Breast cancer                                                                        | Adenomyosis, endometriosis                                      | TAH and BSO. Resection of the mass and of the upper portion of the vagina | No  | Diarrhea, bright red blood per rectum                                                                                    | LPT with distal transection of the rectum                                                                                                                         | RT                                                                  | Rectum, vagina                        | EAC (grade II)                                       | 21, alive   |
| Jimenez R.E. et al. <sup>60</sup> (2000)     | 48 | CEE for 5 y           | Fibromatosis                                                                         | Endometriotic ovarian cyst                                      | TAH and BSO                                                               | No  | Unilateral hydronephrosis                                                                                                | LPT dissection of the mass, right nephroureterectomy, partial colectomy and partial small bowel resection                                                         | No                                                                  | Ureters                               | Adenosquamous endometrioid adenocarcinoma            | U           |
| Mc Cluggage W.G. et al. <sup>61</sup> (2000) | 50 | No                    | G0. Breast cancer. TMX for 3 years                                                   | No                                                              | No                                                                        | No  | AVB, bulky uterus                                                                                                        | TAH and BSO                                                                                                                                                       | No                                                                  | Right ovary and uterus                | EAC                                                  | U           |
| Jennings T.S. et al. <sup>62</sup> (1999)    | 70 | No                    | Infertility. Breast cancer treated with Tamoxifen                                    | No                                                              | Right modified radical mastectomy                                         | No  | Abdominal pain, abdominal mass, constipation                                                                             | TAH, BSO, infracolic omentectomy and pelvic washing                                                                                                               | CHT                                                                 | Ovary                                 | CCC                                                  | 2, alive    |
| Schlesinger C. et al. <sup>63</sup> (1999)   | 62 | No                    | G0. Obesity, hypertension, fibromatosis, breast cancer. TMX for 2 years              | No                                                              | Left partial mastectomy and lymphadenectomy othrt                         | No  | AVB, endometrial polyp                                                                                                   | TAH and BSO                                                                                                                                                       | No                                                                  | Uterus                                | EAC endometrioid type                                | U           |
| Taylor M. et al. <sup>64</sup> (1999)        | 42 | E for 7 y             | None relevant                                                                        | Severe endometriosis                                            | TAH and BSO                                                               | Yes | Massive ascitis                                                                                                          |                                                                                                                                                                   | CHT                                                                 | Pelvis                                | EAC                                                  | 2, alive    |
| Sidhu S. et al. <sup>65</sup> (1998)         | 60 | 18 years (E then CEE) | G4 P4.                                                                               | Extensive endometriosis                                         | TAH nd BSO. Anterior colon resection.                                     | Yes | Pain, mass                                                                                                               | Debulking surgery (not possible complete resection)                                                                                                               | RT                                                                  | Pelvis                                | Sertiform endometrioid adenocarcinoma                | U           |
| Horiuchi A. et al. <sup>66</sup> (1998)      | 53 | No                    | None relevant                                                                        | No                                                              | None                                                                      | No  | Pelvic mass, ascites, high fever, low abdominal pain                                                                     | TAH, BSO, pelvic LNT                                                                                                                                              | CHT (carboplatino/ vyncristin/ cisplatin/ actinomycin/ pepleomycin) | Left ovary                            | EAC, Yolk Sac Tumour arising from endometriotic cyst | 6, deceased |
| Abu M.A.E. et al. <sup>67</sup> (1997)       | 38 | E for 13 y            | None relevant                                                                        | Extensive endometriosis involgign both ovaries, adenomyosis     | TAH and BSO                                                               | No  | Intermittent vaginal bleeding. Ulcerated area over vaginal vault, polyp like lesion on vaginal vault found 4 weeks later | Unspecified surgery                                                                                                                                               | Neoadjuvant progestin therapy, RT                                   | Pelvis                                | EAC                                                  | U           |

|                                                     |    |                                   |                                                        |                                                        |                                                                          |     |                                                                        |                                                                                                      |                                                 |                                                        |                                                        |               |
|-----------------------------------------------------|----|-----------------------------------|--------------------------------------------------------|--------------------------------------------------------|--------------------------------------------------------------------------|-----|------------------------------------------------------------------------|------------------------------------------------------------------------------------------------------|-------------------------------------------------|--------------------------------------------------------|--------------------------------------------------------|---------------|
| <b>Eichhorn J.H. et al.<sup>68</sup> (1996)</b>     | 43 | High-dose combination CO 3 months | None relevant                                          | Endometriosis,                                         | No                                                                       | No  | AVB, marked fall in hematocrit                                         | TAH, BSO, partial colectomy                                                                          | No                                              | Ovary                                                  | Endometrioid cell-ciliated tumors (EAC)                | 42, alive     |
|                                                     | 44 | No                                | None relevant                                          | Endometriosis                                          | No                                                                       | No  | Pelvic mass                                                            | TAH, BSO, peritoneal biopses                                                                         | No                                              | Ovary                                                  | Endometrioid cell-ciliated tumors (EAC)                | 21, alive     |
| <b>Mc Cluggage W.G. et al.<sup>69</sup> (1996)</b>  | 62 | E for 5 y                         | Simple serous cystadenoma                              | No                                                     | TAH and right ovarian cystectomy                                         | No  | AVB                                                                    | Partial vaginectomy, bilateral oophorectomy and partial omentectomy                                  | No                                              | Left ovary, rectum, sigmoid colon, retrovaginal septum | Endometrial stromal sarcoma                            | 3, alive      |
| <b>Cohen I. et al.<sup>70</sup> (1994)</b>          | 71 | U                                 | Infertility, breast cancer. TMX for 1 year             | No                                                     | Right radical mastectomy; LPT for treatment of bilateral tubal occlusion | No  | Asymptomatic                                                           | TAH, BSO, periaortic lymph node sampling                                                             | CHT                                             | Ovary                                                  | EAC                                                    | 24, alive     |
| <b>Dunn S. et al.<sup>71</sup> (1993)</b>           | 62 | Estradiol for 20 y                | G2 P2                                                  | Severe endometriosis (ovaries and rectovaginal septum) | TAH and BSO                                                              | Yes | Pelvic mass                                                            | Mass excision en bloc with rectosigmoid colon                                                        | RT                                              | Rectosigmoid colon                                     | EAC                                                    | 1.5, deceased |
| <b>Vara A.R. et al.<sup>72</sup> (1990)</b>         | 62 | No                                | AVB, fibromatosis                                      | Cervical endometriosis                                 | TAH and BSO 10 y previously                                              | No  | Gross hematuria, 20-pound weight, vague suprapubic pain                | Radical cystectomy and urethrectomy with wide excision of the anterior vaginal wall                  | No                                              | Bladder                                                | Endometrioid adenocarcinoma                            | 12, alive     |
| <b>Heaps J.M. et al.<sup>73</sup>(1990)</b>         | 47 | E for 7 y                         | None relevant                                          | Endometriosis                                          | TAH and BSO                                                              | No  | Pelvic mass, bleeding, pain                                            | U                                                                                                    | No                                              | Cul de sc, peritoneum                                  | Adenocarcinoma                                         | U             |
|                                                     | 59 | E for 5 y                         | None relevant                                          | Endometriosis                                          | TAH and BSO                                                              | No  | Pelvic mass, bleeding, pain                                            | U                                                                                                    | No                                              | Cul de sac, peritoneum                                 | Adenocarcinoma                                         | U             |
|                                                     | 62 | E for 11 y                        | None relevant                                          | Endometriosis                                          | TAH and BSO                                                              | No  | Pelvic mass, bleeding, pain                                            | U                                                                                                    | No                                              | Cul de sac, peritoneum                                 | Adenocarcinoma                                         | U             |
|                                                     | 47 | E for 2 y                         | None relevant                                          | Endometriosis                                          | TAH and BSO                                                              | No  | Pelvic mass, bleeding, pain                                            | U                                                                                                    | No                                              | Cul de sac, peritoneum                                 | Adenosquamous carcinoma, CCC features                  | U             |
| <b>Orr J.W. et al.<sup>74</sup> (1989)</b>          | 60 | E for 22 y                        | G0                                                     | Pelvic endometriosis                                   | TAH and BSO                                                              | Yes | Pelvic mass                                                            | En bloc resection with low rectal reanastomosis, pelvic, LNT, para-aortic node biopsy                | RT                                              | Vaginal vault and parametrium                          | Adenocarcinoma                                         | 6, recurrence |
| <b>Al Izzi M.S. et al.<sup>75</sup> (1988)</b>      | 62 | No                                | Abdominal pain and intermenstrual/ postcoital bleeding | Bladder endometriosis                                  | AH and BSO (13 y before)                                                 | No  | Painless haematuria                                                    | Total radical cystectomy and ileal loop diversion                                                    | No                                              | Bladder                                                | EAC with occasional foci of clear cell differentiation | 24, alive     |
| <b>Remnitz C. et al.<sup>76</sup> (1988)</b>        | 58 | CEE for 12 y                      | Leiomyoma                                              | Extensive endometriosis                                | TAH and BSO                                                              | Yes | Beeding, pain, unilateral renal obstruction                            | Surgery                                                                                              | Progestin therapy                               | Pelvis                                                 | EAC                                                    | 60, alive     |
|                                                     | 47 | CEE for 4 y                       | None relevant                                          | Extensive endometriosis                                | TAH and BSO                                                              | yes | Pain, renal obstruction                                                | Undefined surgery                                                                                    | Progestin therapy, RT, CHT                      | Pelvis                                                 | Adenocarcinoma, adenosquamous carcinoma                | 1, deceased   |
| <b>Brunson G.L. et al.<sup>77</sup> (1988)</b>      | 63 | DES for 4 y                       | G2 P2, fibromatosis                                    | No                                                     | TAH and BSO                                                              | No  | Pain, postprandial nausea and vomiting                                 | Segmental ureterectomy and reimplantation                                                            | RT                                              | Ureter                                                 | Adenocarcinoma                                         | U, alive      |
|                                                     | 59 | No                                | None relevant                                          | Severe endometriosis                                   | TAH and BSO                                                              | Yes | Left lower abdominal pain and gross hematuria                          | Left nephroureterectomy                                                                              | CHT (5fluorouracil/ adriamycin/cytosan/ magace) | Ureter                                                 | Adenocarcinoma                                         | 22, deceased  |
| <b>Granai C.O. et al.<sup>78</sup> (1984)</b>       | 47 | E for 13 y                        | None relevant                                          | Endometriosis                                          | TAH and BSO                                                              | Yes | AVB                                                                    | U                                                                                                    | No                                              | Vagina                                                 | Adenocarcinoma                                         | U             |
| <b>Kapp D.S. et al.<sup>79</sup> (1982)</b>         | 35 | CEE for 7 months                  | G2 P2.                                                 | Endometriosis                                          | Cesarean section. TAH and BSO                                            | Yes | AVB                                                                    | No                                                                                                   | RT                                              | Vagina                                                 | Adenocarcinoma                                         | 7, alive      |
| <b>Shamsuddin A.K.M. et al.<sup>80</sup> (1979)</b> | 55 | DES for 14 y                      | Fibromatosis                                           | Sever endoemtriosis                                    | TAH and BSO                                                              | Yes | Pain, nocturia, dysuria                                                | Segmentary resection of sigmoid colon and left ureter, partial cystectomy and left sigmoid colostomy | CHT                                             | Vescicovaginal septum                                  | EAC                                                    | U             |
| <b>Lott J.V. et al.<sup>81</sup> (1978)</b>         | 53 | DES for 15 y                      | G3 P3                                                  | Pelvic endometriosis                                   | TAH and BSO                                                              | Yes | Rectal bleeding                                                        | Anterior resection of the sigmoid and rectum                                                         | No                                              | Rectum                                                 | EAC                                                    | U, alive      |
| <b>Berkowitz R.S. et al.<sup>82</sup> (1978)</b>    | 57 | CEE for 13 y                      | None relevant                                          | Endometriosis                                          | TAH and BSO                                                              | Yes | AVB                                                                    | U                                                                                                    | No                                              | Vagina                                                 | Endometrial stromal sarcoma                            | U             |
| <b>Brooks J.J. et al.<sup>83</sup> (1977)</b>       | 48 | E for 4 y                         | G0, fibromatosis                                       | Extensive endometriosis, adenomyosis                   | STH and BSO                                                              | Yes | Mild right sided lower abdominal pain, urinary frequency, constipation | Unspecified surgery                                                                                  | RT                                              | Retroperitoneal                                        | CCC                                                    | 22, alive     |
| <b>Young E. et al.<sup>84</sup> (1969)</b>          | 47 | CEE + T for 14 y                  | None relevant                                          | No                                                     | TAH and BSO                                                              | No  | AVB                                                                    | Total pelvic exenteration                                                                            | No                                              | Rectovaginal                                           | Adenoacanthoma                                         | U, alive      |

Abbreviations: TLH: total laparoscopic hysterectomy; BSO: bilateral salpingo oophorectomy; TAH: total abdominal hysterectomy; RAH: radical abdominal hysterectomy; STH: subtotal hysterectomy; AH: abdominal hysterectomy; D&C: dilatation and curettage; HSC: hysteroscopy RT: radiotherapy; CHT: chemotherapy; LPS: laparoscopy; LPT: laparotomy; MRI: magnetic resonance; CT: computed tomography; US: ultrasound; Y: years; G: gravid; P: parity; U: unspecified; EOC: epithelial ovarian cancer; CCC: clear cell carcinoma; EAC: endometrioid adenocarcinoma; M: metastases; HRT: hormone replacement therapy; CEE: conjugated equin estrogen; U: unspecified; AVB: abnormal vaginal bleeding; LNT: lymphadenectomy; DES: diethylstilbestrol; T: testosterone.
